# Supplementary material
Source: publisher figshare collection journal article supplement (https://acs.figshare.com/ndownloader/files/7719322)
Supplement: Supplementary file 1 [file 7719322]

## **Supporting Information**

### **Flexible Antibacterial Film Based on Conjugated Polyelectrolyte/Silver Nanocomposites**

Xiaoyu Wang,<sup>#,†</sup> Shuxian Zhu,<sup>#,†</sup> Lu Liu,<sup>†</sup> and Lidong Li<sup>\*,†,‡</sup>

<sup>†</sup>State Key Laboratory for Advanced Metals and Materials, School of Materials  
Science and Engineering, University of Science and Technology Beijing, Beijing  
100083, P. R. China

<sup>‡</sup>State Key Laboratory of Fine Chemicals, Dalian University of Technology, Dalian  
116024, P. R. China

#### **Corresponding Author**

\*E-mail: lidong@mater.ustb.edu.cn (L.L.)

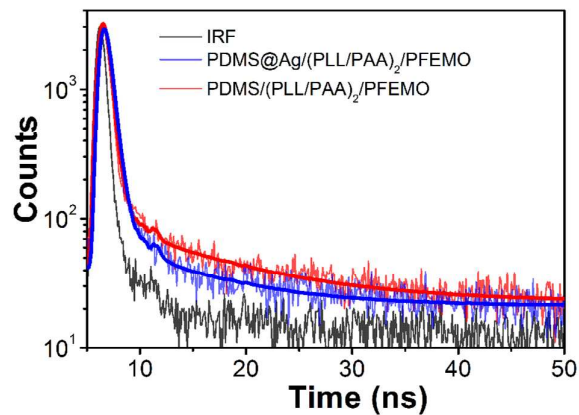

**Figure S1.** Fluorescence intensity decay of emission at 488 nm for PDMS@Ag/(PLL/PAA)<sub>2</sub>/PFEMO and PDMS/(PLL/PAA)<sub>2</sub>/PFEMO at room temperature.

**Table S1.** Exponential component analysis of the intensity decay of PFEMO measured by time-correlated single-photon counting.

| sample                               | B <sub>i</sub> | τ <sub>i</sub> (ns) | f <sub>i</sub> | χ <sup>2</sup> | <τ> (ns) |
|--------------------------------------|----------------|---------------------|----------------|----------------|----------|
| PDMS/(PLL/PAA) <sub>2</sub> /PFEMO   | 0.4321         | 0.34                | 86.227%        | 2.642          | 1.73     |
|                                      | 0.0022         | 10.544              | 13.773%        |                |          |
| PDMS@Ag(PLL/PAA) <sub>2</sub> /PFEMO | 0.3447         | 0.413               | 88.904%        | 2.625          | 1.42     |
|                                      | 0.0019         | 9.449               | 11.096%        |                |          |

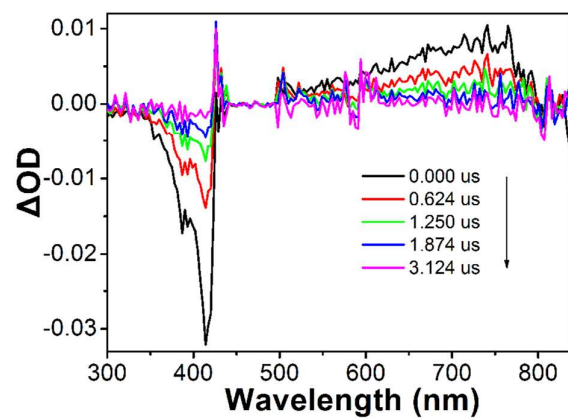

**Figure S2.** Transient absorption spectra of PFEMO in argon-saturated ethanol at different times after excitation.
